# Supplementary material for: Electrophysiological Responses from the Human Tongue to the Six Taste Qualities and Their Relationships with PROP Taster Status
Source: MDPI journal article supplement (doi:10.3390/nu12072017), 2020-07-07
Supplement: s1 [file s1]

**Supplementary Material:**

**Table S1.** Ratings of perceived taste intensity in response to three concentrations of PROP and NaCl in the taster groups.

|                      | <b>Super-taster<br/>(<i>n</i> = 10)</b> | <b>Medium taster<br/>(<i>n</i> = 15)</b> | <b>Non-tasters<br/>(<i>n</i> = 14)</b> |
|----------------------|-----------------------------------------|------------------------------------------|----------------------------------------|
| <b>PROP (mmol/L)</b> |                                         |                                          |                                        |
| 0.032                | 11.99 ± 2.74                            | 4.58 ± 1.26                              | 0.97 ± 0.46                            |
| 0.32                 | 47.39 ± 4.69*                           | 36.23 ± 3.94                             | 3.73 ± 0.94*                           |
| 3.2                  | 86.50 ± 3.80*                           | 64.83 ± 4.98                             | 25.66 ± 4.71*                          |
| <b>NaCl (mol/L)</b>  |                                         |                                          |                                        |
| 0.01                 | 1.44 ± 0.43                             | 2.36 ± 1.33                              | 3.30 ± 1.23                            |
| 0.1                  | 26.50 ± 5.69*                           | 31.59 ± 3.52                             | 31.13 ± 4.33*                          |
| 1                    | 57.75 ± 6.45*                           | 71.86 ± 4.73                             | 60.14 ± 4.03*                          |

Values are means ± SEM. *n* = 39. Three-way ANOVA was used to compare PROP intensity ratings with NaCl intensity ratings across groups ( $F_{4,217} = 6.248$ ;  $p = 0.00009$ ).

\* = significant difference between PROP and the corresponding NaCl concentration ( $p < 0.00017$ ; Duncan's test).
